# Supplementary material for: 5-Aminolevulinic Acid Triggered by Ultrasound Halts Tumor Proliferation in a Syngeneic Model of Breast Cancer
Source: MDPI journal article supplement (doi:10.3390/ph14100972), 2021-09-25
Supplement: s1 [file s1]

## Supplementary Material

**Table S1** Raw data of PARP cleavage after SDT related to Figure 2

| PARP/ $\beta$ -Actin |          |          |          |          |
|----------------------|----------|----------|----------|----------|
| Experiment 1         | Animal 1 | Animal 2 | Animal 3 | Animal 4 |
| Ctrl                 | 0.500    | 0.267    | 0.279    | 0.600    |
| Ala + US             | 1.230    | 0.870    | 1.350    | 0.760    |
| Experiment 2         | Animal 1 | Animal 2 | Animal 3 | Animal 4 |
| Ctrl                 | 0.199    | 0.230    | 0.320    | 0.225    |
| Ala + US             | 0.680    | 0.776    | 0.990    | 1.450    |
| Experiment 3         | Animal 1 | Animal 2 | Animal 3 | Animal 4 |
| Ctrl                 | 0.567    | 0.360    | 0.278    | 0.230    |
| Ala + US             | 1.200    | 0.450    | 0.678    | 0.543    |

**Table S2** Raw data of *CASP3* mRNA expression after SDT related to Figure 2

| <i>CASP 3</i> (normalized fold expression) |          |          |          |          |
|--------------------------------------------|----------|----------|----------|----------|
| Experiment 1                               | Animal 1 | Animal 2 | Animal 3 | Animal 4 |
| Ctrl                                       | 0.980    | 1.011    | 0.990    | 1.099    |
| Ala + US                                   | 1.870    | 2.760    | 1.760    | 1.850    |
| Experiment 2                               | Animal 1 | Animal 2 | Animal 3 | Animal 4 |
| Ctrl                                       | 1.060    | 0.987    | 1.120    | 0.980    |
| Ala + US                                   | 2.098    | 1.987    | 1.834    | 1.678    |
| Experiment 3                               | Animal 1 | Animal 2 | Animal 3 | Animal 4 |
| Ctrl                                       | 1.087    | 1.090    | 0.987    | 0.870    |
| Ala + US                                   | 1.090    | 2.987    | 1.911    | 2.700    |

**Table S3** Raw data of *TP53* mRNA expression after SDT related to Figure 3

| <i>TP53</i> (normalized fold expression) |          |          |          |          |
|------------------------------------------|----------|----------|----------|----------|
| Experiment 1                             | Animal 1 | Animal 2 | Animal 3 | Animal 4 |
| Ctrl                                     | 0.880    | 1.230    | 0.870    | 0.876    |
| Ala + US                                 | 1.170    | 1.120    | 1.370    | 1.266    |
| Experiment 2                             | Animal 1 | Animal 2 | Animal 3 | Animal 4 |
| Ctrl                                     | 0.870    | 1.100    | 0.988    | 0.865    |
| Ala + US                                 | 1.230    | 0.987    | 1.450    | 1.780    |
| Experiment 3                             | Animal 1 | Animal 2 | Animal 3 | Animal 4 |
| Ctrl                                     | 1.130    | 0.780    | 0.567    | 0.890    |
| Ala + US                                 | 1.333    | 1.499    | 1.490    | 0.899    |

**Table S4** Raw data of Ki67 protein expression after SDT related to Figure 3

| Ki67 (% of positive cells) |          |          |          |          |
|----------------------------|----------|----------|----------|----------|
| Experiment 1               | Animal 1 | Animal 2 | Animal 3 | Animal 4 |
| Ctrl                       | 17.890   | 12.990   | 14.799   | 13.449   |
| Ala + US                   | 4.890    | 7.670    | 6.520    | 6.234    |
| Experiment 2               | Animal 1 | Animal 2 | Animal 3 | Animal 4 |
| Ctrl                       | 13.950   | 11.570   | 9.590    | 17.990   |
| Ala + US                   | 6.780    | 5.150    | 4.600    | 5.780    |
| Experiment 3               | Animal 1 | Animal 2 | Animal 3 | Animal 4 |
| Ctrl                       | 8.900    | 12.580   | 11.970   | 9.976    |
| Ala + US                   | 4.660    | 5.290    | 6.450    | 3.980    |

**Table S5** Raw data of *HIF-1 $\alpha$*  mRNA expression after SDT related to Figure 4

| <i>HIF1-<math>\alpha</math></i> (normalized fold expression) |          |          |          |          |
|--------------------------------------------------------------|----------|----------|----------|----------|
| Experiment 1                                                 | Animal 1 | Animal 2 | Animal 3 | Animal 4 |
| Ctrl                                                         | 0.980    | 1.230    | 1.120    | 0.786    |
| Ala + US                                                     | 0.516    | 0.370    | 0.171    | 0.312    |
| Experiment 2                                                 | Animal 1 | Animal 2 | Animal 3 | Animal 4 |
| Ctrl                                                         | 0.999    | 1.112    | 1.340    | 0.777    |
| Ala + US                                                     | 0.333    | 0.307    | 0.416    | 0.208    |
| Experiment 3                                                 | Animal 1 | Animal 2 | Animal 3 | Animal 4 |
| Ctrl                                                         | 0.887    | 1.123    | 0.998    | 0.667    |
| Ala + US                                                     | 0.340    | 0.207    | 0.105    | 0.330    |

**Table S6** VEGF protein expression after SDT related to Figure 4

| VEGF (C-1)/ $\beta$ -Actin |          |          |          |          |
|----------------------------|----------|----------|----------|----------|
| Experiment 1               | Animal 1 | Animal 2 | Animal 3 | Animal 4 |
| Ctrl                       | 0.700    | 0.900    | 0.800    | 0.770    |
| Ala + US                   | 1.400    | 1.480    | 1.350    | 1.602    |
| Experiment 2               | Animal 1 | Animal 2 | Animal 3 | Animal 4 |
| Ctrl                       | 1.112    | 1.191    | 1.100    | 0.780    |
| Ala + US                   | 1.270    | 1.211    | 1.588    | 1.270    |
| Experiment 3               | Animal 1 | Animal 2 | Animal 3 | Animal 4 |
| Ctrl                       | 1.300    | 1.400    | 0.991    | 1.119    |
| Ala + US                   | 1.357    | 1.649    | 1.664    | 1.501    |

**Table S7** Raw data of *NFE2L2* mRNA expression after SDT related to Figure 5

| <i>NFE2L2</i> (normalized fold expression) |          |          |          |          |
|--------------------------------------------|----------|----------|----------|----------|
| Experiment 1                               | Animal 1 | Animal 2 | Animal 3 | Animal 4 |
| Ctrl                                       | 0.870    | 0.987    | 1.130    | 0.695    |
| Ala + US                                   | 2.745    | 1.670    | 2.030    | 1.876    |
| Experiment 2                               | Animal 1 | Animal 2 | Animal 3 | Animal 4 |
| Ctrl                                       | 1.220    | 0.983    | 0.699    | 1.149    |
| Ala + US                                   | 1.983    | 1.335    | 1.786    | 2.650    |
| Experiment 3                               | Animal 1 | Animal 2 | Animal 3 | Animal 4 |
| Ctrl                                       | 0.933    | 0.893    | 0.989    | 1.233    |
| Ala + US                                   | 2.699    | 1.568    | 1.399    | 2.176    |

**Table S8** Raw data of *NQO1* mRNA expression after SDT related to Figure 5

| <i>NQO1</i> (normalized fold expression) |          |          |          |          |
|------------------------------------------|----------|----------|----------|----------|
| Experiment 1                             | Animal 1 | Animal 2 | Animal 3 | Animal 4 |
| Ctrl                                     | 1.150    | 0.860    | 0.954    | 1.100    |
| Ala + US                                 | 0.580    | 0.450    | 0.339    | 0.277    |
| Experiment 2                             | Animal 1 | Animal 2 | Animal 3 | Animal 4 |
| Ctrl                                     | 1.230    | 0.876    | 0.987    | 0.543    |
| Ala + US                                 | 0.230    | 0.695    | 0.233    | 0.489    |
| Experiment 3                             | Animal 1 | Animal 2 | Animal 3 | Animal 4 |
| Ctrl                                     | 1,098    | 1,357    | 0,997    | 0,854    |
| Ala + US                                 | 0.490    | 0.279    | 0.330    | 0.399    |

**Table S9** Raw data of LC3 A/B protein expression after SDT related to Figure 6

| LC3 A/B/ $\beta$ -Actin |          |          |          |          |
|-------------------------|----------|----------|----------|----------|
| Experiment 1            | Animal 1 | Animal 2 | Animal 3 | Animal 4 |
| Ctrl                    | 0.289    | 0.460    | 0.344    | 0.163    |
| Ala + US                | 2.485    | 2.601    | 2.980    | 2.098    |
| Experiment 2            | Animal 1 | Animal 2 | Animal 3 | Animal 4 |
| Ctrl                    | 0.648    | 0.563    | 0.448    | 0.555    |
| Ala + US                | 2.178    | 2.250    | 2.147    | 2.493    |
| Experiment 3            | Animal 1 | Animal 2 | Animal 3 | Animal 4 |
| Ctrl                    | 1.136    | 1.034    | 1.549    | 1.559    |
| Ala + US                | 2.586    | 3.687    | 3.175    | 2.765    |
